# Supplementary material for: Effective Detection of Phenylalanine Using Pyridine Based Sensor
Source: Research Square preprint supplement (doi:10.21203/rs.3.rs-1045744/v1), 2021-11-10
Supplement: Supplementary file 1 [file 5da410ac5b323af5f1c039c8.docx]

**Supporting Information for**

**Effective detection of phenylalanine optically using pyridine based sensor**

Vijayakumar Sathya,a Venkatesan Srinivasadesikan,b Shyi-Long Lee,c Vediappen Padmini*a

aDepartment of Organic Chemistry, School of Chemistry, Madurai Kamaraj University, Madurai-625021, Tamilnadu, India.

bDivision of Chemistry, Department of Sciences and Humanities, Vignan's Foundation for Science, Technology and Research, Vadlamudi, Guntur, 522 213,Andhra Pradesh, India.

cDepartment of Chemistry and Biochemistry, National Chung-Cheng University, Chia-Yi, 621, Taiwan.

E-mail*:* [*padmini.chem@mkuniversity.org*](mailto:padmini.chem@mkuniversity.org)

**CONTENT**

1. **Preparative protocol for probe**
2. **1H NMR spectrum for the synthesized probe**
3. **13C NMR spectrum for the synthesized probe**
4. **ESI-Mass Spectra the synthesized probe**
5. **UV-Visible and emission spectral characterization for synthesized probe**
6. **Effect of pH**
7. **Stoichiometry determination through Jobs’ plot**
8. **Colorimetric and Fluorimetric detection of PA**
9. **Determination of Quantum yield for probe**
10. **Real sample analysis of phenylalanine human biofluids by standard addition method**
11. **Test strip method**
12. **Competitive experiment with PA**
13. **Determination of Limit of Detection (LOD)**
14. **B-H plot**
15. **DFT studies**
16. **References**
17. **Preparative protocol for probe**

Scheme.1. Preparation of the probe

.

**FigureS1: 1H NMR spectrum of probe in CDCl3**

**
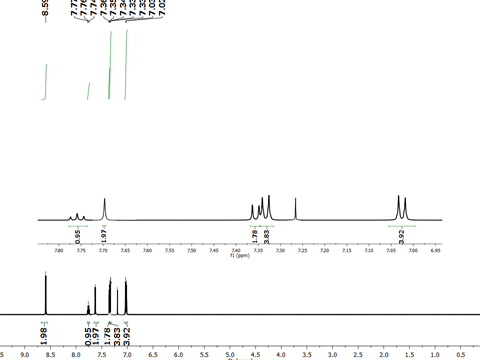
**

**FigureS2: 13C NMR spectrum of probe in CDCl3**

**
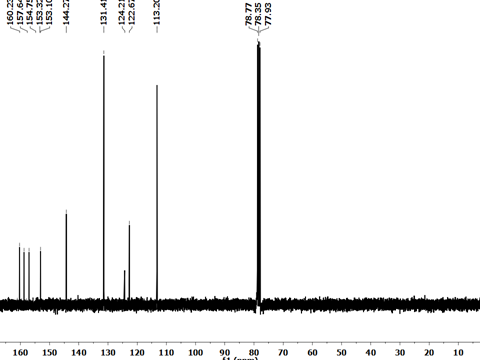
**

**Figure.S3: ESI-Mass Spectrumof the probe**


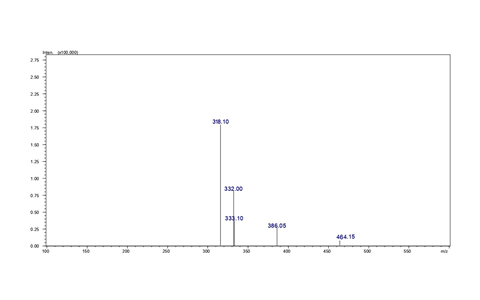


**Figure.S4: Mass Spectrum of probe with phenylalanine**

**
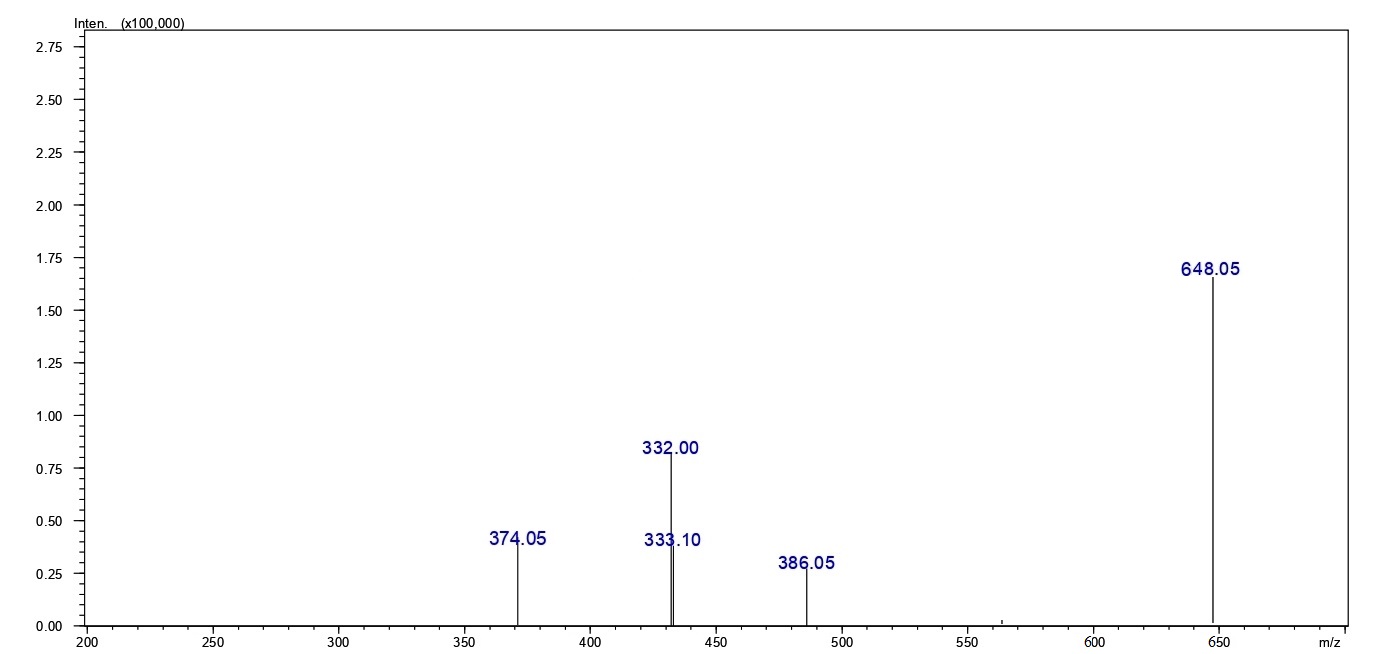
**

**

**

**Figure S5.** Effect of pH on fluorescent intensity of probe with PA

**

**

**Figure S7.**Job’s plot for the determination of stoichiometry between the probe & PA.[1]


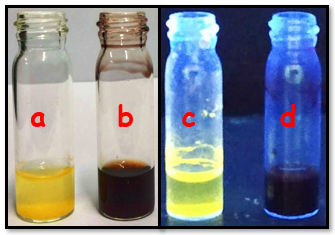


**Figure S8a**. Colorimetric and fluorimetric response of probe (a) & (c) and probe + PA (b) & (d) at pH 7.2.


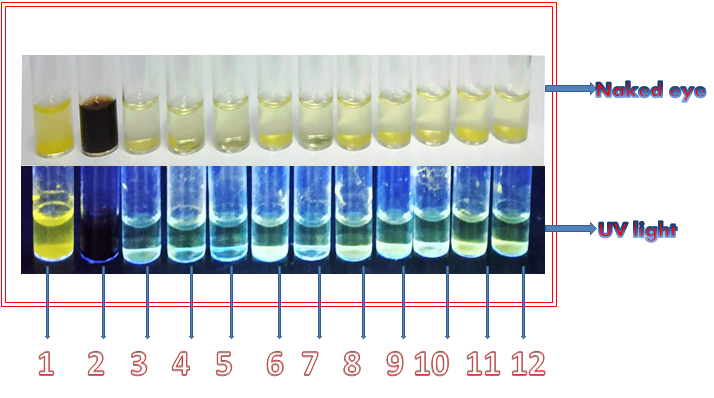


**Figure.S8b:** Colorimetric and fluorimetric response of PAunder naked eye as well

as UV lamp detection.

| - **1 - Probe** | - **7 - Probe + Ascorbic Acid** |
| --- | --- |
| - **2 - Probe + phenylalanine** | - **8 - Probe + Cysteine** |
| - **3 - Probe + Leucine** | - **9 - Probe + Tryptophan** |
| - **4 - Probe + Asparagine** | - **10 - Probe + Alanine** |
| - **5 - Probe + Urea** | - **11 – Probe + Glutamine** |
| - **6 - Probe + Creatinine** | - **12 – Probe + Albumin** |

**9. Determination of quantum yield for the pyridine derivative**

The fluorescence quantum yield (ɸ) has been determined for probe by the equation shown below. Rhodamine 6G was as a standard in ethanol, the quantum yield is 0.95. The probe concentration is 1x10-6M and the integrated area is determined from the absorption spectrum. The calculated quantum yield is 0.87. [2]

**ɸu =ɸsFuAsɳu2**

**FsAuɳs2**

**10. Real sample analysis for phenylalanine in human biofluids**

Human biofluids such as blood and urine are used for the real sample test following standard addition method. Separation of serum from the biofluids was effected by centrifuging in REMI centrifuge with 2,000 rpm in 1hr time interval. After that the blood serum was kept at 0°C before testing.

Initially, a known concentration of probe (5µM) was added into the human serum and urine samples. Then, different concentrations of phenylalanine like 20 nM, 50 nM, 100 nM, 200 nM, 300 nM, 400 nM, 500 nM, 20 µM, 50 µM, 100 µM, 200 µM, 300 µM, 400 µM and 500 µM are spiked into the blood and urine sample. Which was incubated for 15-20mins.The results were then recorded. [3]

**Table 10.1: Detection of phenylalanine in human serum of blood sample**

| **Sample**  **(blood)** | **Amount of phenylalanine determined**  **in PBS (pH=7.2)** | **Fluorescent intensity determined in in PBS (pH=7.2)** | **Amount of phenylalanine spiked in human serum** | **Fluorescent intensity**  **determined in human serum** | **Recovery (in %)** |
| --- | --- | --- | --- | --- | --- |
|  | 50 nM | 195 | 50 nM | 190 | 97 |
|  | 100 nM | 182 | 100 nM | 188 | 103 |
|  | 200 nM | 174 | 200 nM | 177 | 102 |
|  | 300 nM | 166 | 300 nM | 168 | 101 |
|  | 400 nM | 152 | 400 nM | 158 | 104 |
|  | 500 nM | 148 | 500 nM | 150 | 101 |
|  | 50 µM | 137 | 50 µM | 139 | 101 |
|  | 100 µM | 123 | 100 µM | 125 | 102 |
|  | 200 µM | 105 | 200 µM | 109 | 104 |
|  | 300 nM | 97 | 300 nM | 100 | 103 |
|  | 400 nM | 73 | 400 nM | 75 | 103 |
|  | 500 µM | 52 | 500 µM | 51 | 98 |

**Table 10.2: Detection of phenylalanine in human serum of urine sample**

| **Sample**  **(urine)** | **Amount of phenylalanine determined**  **in PBS (pH=7.2)** | **Fluorescent intensity determined in in PBS (pH=7.2)** | **Amount of phenylalanine spiked in human urine** | **Fluorescent intensity**  **determined in human urine** | **Recovery (in %)** |
| --- | --- | --- | --- | --- | --- |
|  | 50 nM | 195 | 50 nM | 185 | 95 |
|  | 100 nM | 182 | 100 nM | 186 | 102 |
|  | 200 nM | 174 | 200 nM | 176 | 101 |
|  | 300 nM | 166 | 300 nM | 172 | 104 |
|  | 400 nM | 152 | 400 nM | 161 | 106 |
|  | 500 nM | 148 | 500 nM | 153 | 103 |
|  | 50 µM | 137 | 50 µM | 142 | 104 |
|  | 100 µM | 123 | 100 µM | 125 | 102 |
|  | 200 µM | 105 | 200 µM | 109 | 104 |
|  | 300 nM | 97 | 300 nM | 99 | 102 |
|  | 400 nM | 73 | 400 nM | 72 | 99 |
|  | 500 µM | 52 | 500 µM | 53 | 102 |
|  | 50 nM | 195 | 50 nM | 185 | 95 |
|  | 100 nM | 182 | 100 nM | 186 | 102 |

Recovery (%) = [Fluorescent intensity of phenylalanine added/ Fluorescent intensity of phenylalanine determined] X 100.

1. **Test strip method**


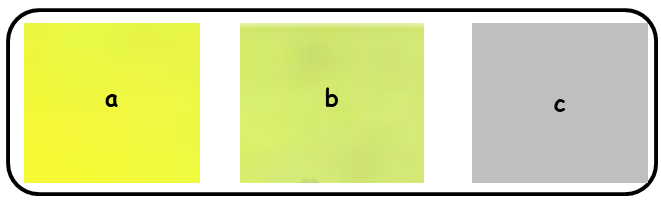


Figure. S11. Photographs of test strips detections (a) Probe; (b) Probe + other interfering

biomolecules ; (c) Probe + PA under the UV lamp.

1. **Competitive experiment with PA**





Figure.S12: Competitive experiments for the fluorescence quenching effect of probe with

phenylalanine in presence of other competitors.[4]

|  | Probe + PA | 7. | Probe + PA + Cysteine |
| --- | --- | --- | --- |
|  | Probe + PA + Leucine | 8. | Probe + PA + Tryptophan |
|  | Probe + PA + Asparagine | 9. | Probe + PA + Alanine |
|  | Probe + PA + Urea | 10. | Probe + PA + Glutamine |
|  | Probe + PA + Creatinine | 11. | Probe + PA + Albumin |
|  | Probe + PA + Ascorbic Acid |

1. **Determination of Limit of Detection (LOD)**


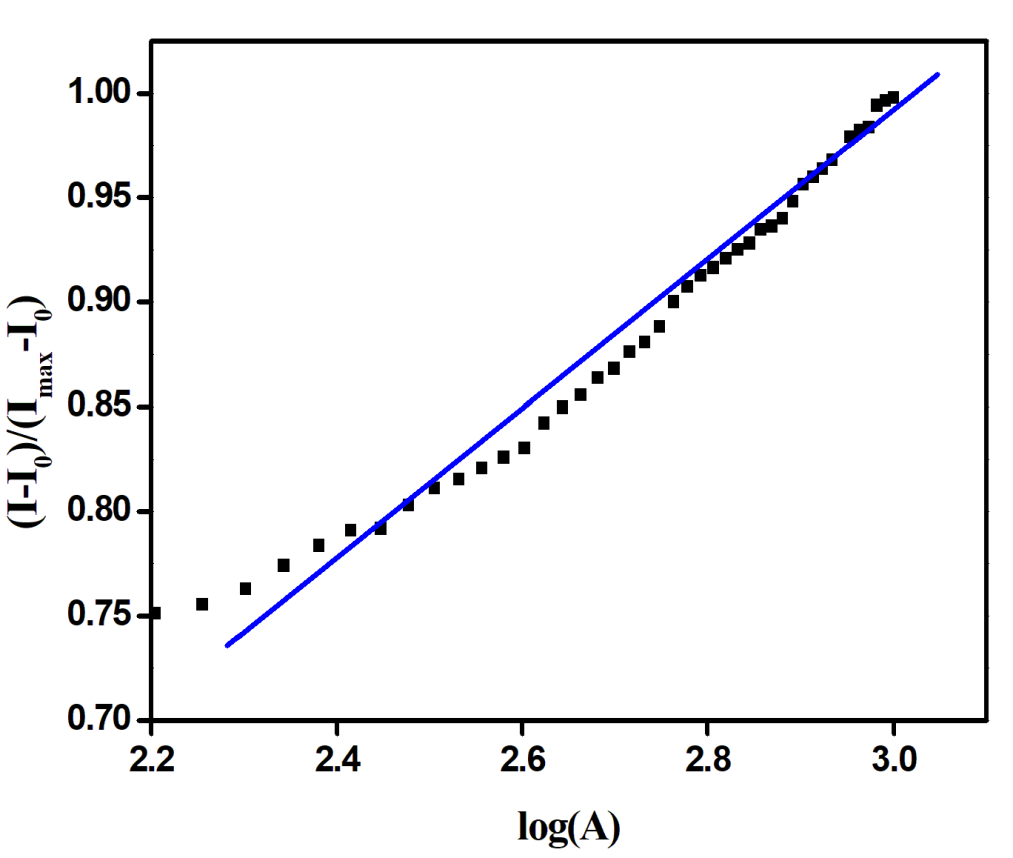


Figure.S13: Linear range for the selective detection of PA.[5]

1. **B-H plot**





Figure. S14. B-H plot of probe with analyte.

1. **DFT studies**

**Table.** Frontier Molecular Orbital diagram obtained at B3LYP/6-31g(d,p) in gas phase

| **Probe** | | | |
| --- | --- | --- | --- |
| HOMO |  | HOMO-1 |  |
| LUMO |  | LUMO+1 |  |
| **Complex** | | | |
| HOMO |  | HOMO-1 |  |
| LUMO |  | LUMO+1 |  |
| LUMO+2 |  | | |

1. **References**
2. K. Ponnuvel, J. Ramamoorthy, G. Sivaraman, V. Padmini, *ChemistrySelect,* **2018**, *3*, 12150 –12154.
3. D. Magde, R. Wong, P.G. Seybold, *Photochemistry and Photobiology,* **2002,** *75*, 327-334.
4. W. He, Z. Hu, RSC. Adv., **2016**, 6, 59073-59080.
5. A. Shrivastava, B.G. Vipin, *Chronicles of Young Scientists***, 2011,** *2*, 21-25.
6. A. D. Arulraj, A. Vijayan, M. Vasantha, *Spectrochim Acta A*, **2015,***148*, 355–361.
